# Supplementary material for: Digital In Situ Data Collection in Earth Observation, Monitoring and Agriculture—Progress towards Digital Agriculture
Source: MDPI journal article supplement (doi:10.3390/rs14020393), 2022-01-15
Supplement: s1 [file s1]

**Table S1:** Measurement parameters and devices for field data collection

| <b>Parameter</b>             | <b>Equipment/ Method</b>          |
|------------------------------|-----------------------------------|
| Hyperspectral data           | ASD FieldSpec / SpectralEvolution |
| Aerosol optical thickness    | Sun photometer                    |
| Column of water vapor        | Sun photometer                    |
| Cloud coverage               | Digital camera                    |
| Landscape photos             | Digital camera                    |
| Fractional vegetation cover  | Digital camera                    |
| Prop. of senescent material  | Digital camera                    |
| Fractional vegetation cover  | Estimate                          |
| Prop. of senescent material  | Estimate                          |
| Canopy height                | Folding ruler / Photo with board  |
| Leaf Area Index              | LI-COR LAI-2200                   |
| Biomass (all)                | Gravimetical                      |
| Leaf chlorophyll content     | SPAD-502Plus                      |
| Soil moisture                | HH2 moisture meter                |
| Soil moisture                | Gravimetical                      |
| Soil roughness               | Pin profiler                      |
| Orientation of planting rows | Compass                           |
| Row spacing                  | Folding ruler                     |
| Stems per plant              | Counting                          |
| Phenology                    | BBCH-scale                        |

**Table S2:** Data fields and formats of collected parameters in ESRI Survey123. Following types in alphabetic order are used: **dateTime** uses automatic calculation of recent date and time; **decimal** represents floating number inputs; **file** enables users to upload a local file to the survey; **hidden** type is for internal use, meaning content is not presented to the end-user; **image** connects ESRI survey123 with device internal camera; **integer** limits input to integer numbers; **note** represents a message to the user that is not modifiable; **select\_one** type is a customized single choice list; **text** enable the input of single words and phrases.

| label                                                                      | type                               |
|----------------------------------------------------------------------------|------------------------------------|
| Field Number                                                               | select_one Field                   |
| ESU                                                                        | select_one ESU                     |
| SSU [Letter or Number]                                                     | select_one SSU                     |
| Latitude [Decimal Degrees]                                                 | decimal                            |
| Longitude [Decimal Degrees]                                                | decimal                            |
| Horizontal Accuracy [Meters]                                               | hidden                             |
| Planting Direction [Degrees]                                               | decimal                            |
| Campaign Informations                                                      |                                    |
| Crop Type                                                                  | select_one CropType                |
| Custom crop type                                                           | text                               |
| Campaign Number                                                            | integer                            |
| University Name                                                            | select_one UniversityName          |
| Shortcut                                                                   | text                               |
| Photo North                                                                | image                              |
| Photo East                                                                 | image                              |
| Photo South                                                                | image                              |
| Photo West                                                                 | image                              |
| Sky Photo                                                                  | image                              |
| Pin Profiler                                                               |                                    |
| Photo with plant orientation                                               | image                              |
| Photo orthogonal to plant orientation                                      | image                              |
| Date and Time [Start]                                                      | dateTime                           |
| Fractional Vegetation Cover (FVC) + Proportion of senescent Material (PSM) |                                    |
| Number of present students                                                 | select_one<br>FVCPSMStudentsNumber |
| FVC [1] - estimation by 1st Student [%]                                    | integer                            |
| PSM [1] - estimation by 1st Student [%]                                    | integer                            |
| FVC [2] - estimation by 2nd Student [%]                                    | integer                            |
| PSM [2] - estimation by 2nd Student [%]                                    | integer                            |
| FVC [3] - estimation by 3rd Student [%]                                    | integer                            |

|                                                      |                                  |
|------------------------------------------------------|----------------------------------|
| PSM [3] - estimation by 3rd Student [%]              | integer                          |
| FVC [4] - estimation by 4th Student [%]              | integer                          |
| PSM [4] - estimation by 4th Student [%]              | integer                          |
| FVC [5] - estimation by 5th Student [%]              | integer                          |
| PSM [5] - estimation by 5th Student [%]              | integer                          |
| FVC [Advisor] - estimation by advisor [%] [optional] | integer                          |
| PSM [Advisor] - estimation by advisor [%] [optional] | integer                          |
| FVC final [%]:                                       | note                             |
| PSM final [%]:                                       | note                             |
| Photo Nadir                                          | image                            |
| Phenology                                            |                                  |
| Number of present students                           | select_one<br>BBCHStudentsNumber |
| BBCH - 1st Student                                   | integer                          |
| BBCH - 2nd Student                                   | integer                          |
| BBCH - 3rd Student                                   | integer                          |
| BBCH - 4th Student                                   | integer                          |
| BBCH - 5th Student                                   | integer                          |
| BBCH - Advisor                                       | integer                          |
| BBCH - Minimum                                       | integer                          |
| BBCH - Median                                        | decimal                          |
| BBCH - Maximum                                       | integer                          |
| BBCH - Final                                         | integer                          |
| Canopy Height                                        |                                  |
| Select type of Measuring Person                      | select_one MPtype                |
| Measuring Person [Name]                              | select_one_external MP           |
| Measuring Person [Canopy]                            | hidden                           |
| Select type of Minute Taker                          | select_one MPtype                |
| Minute Taker [Name]                                  | select_one_external MP           |
| Minute Taker [Canopy]                                | hidden                           |
| M1 - Canopy Height [cm]                              | integer                          |
| M2 - Canopy Height [cm]                              | integer                          |
| M3 - Canopy Height [cm]                              | integer                          |
| M4 - Canopy Height [cm]                              | integer                          |
| Canopy Height - average [cm]:                        | note                             |
| Measuring Tool available?                            | select_one Measuringboard        |
| Canopy Height Photo 1                                | image                            |
| Canopy Height Photo 2                                | image                            |
| Fresh Biomass                                        |                                  |
| Select type of Measuring Person                      | select_one MPtype                |
| Measuring Person [Name]                              | select_one_external MP           |
| Measuring Person [wetbio]                            | hidden                           |

|                                        |                                     |
|----------------------------------------|-------------------------------------|
| Select type of Minute Taker            | select_one MPtype                   |
| Minute Taker [Name]                    | select_one_external MP              |
| Minute Taker [wetbio]                  | hidden                              |
| Amount of stems in the frame           | decimal                             |
| Number of rows in the frame            | decimal                             |
| Number of rows in 1 meter              | decimal                             |
| Number of stems harvested              | decimal                             |
| ID of bag                              | text                                |
| Weight biomass field                   | decimal                             |
| Chlorophyll Content (10 Measurements)  |                                     |
| Select type of Measuring Person        | select_one MPtype                   |
| Measuring Person [Name]                | select_one_external MP              |
| Measuring Person [Chlorophyll]         | hidden                              |
| Select type of Minute Taker            | select_one MPtype                   |
| Minute Taker [Name]                    | select_one_external MP              |
| Minute Taker [Chlorophyll]             | hidden                              |
| M1 - Chlorophyll Content [SPAD]        | decimal                             |
| M2 - Chlorophyll Content [SPAD]        | decimal                             |
| M3 - Chlorophyll Content [SPAD]        | decimal                             |
| M4 - Chlorophyll Content [SPAD]        | decimal                             |
| Average (Top) - Chlorophyll Content    | note                                |
| M5 - Chlorophyll Content [SPAD]        | decimal                             |
| M6 - Chlorophyll Content [SPAD]        | decimal                             |
| M7 - Chlorophyll Content [SPAD]        | decimal                             |
| Average (Middle) - Chlorophyll Content | note                                |
| M8 - Chlorophyll Content [SPAD]        | decimal                             |
| M9 - Chlorophyll Content [SPAD]        | decimal                             |
| M10 - Chlorophyll Content [SPAD]       | decimal                             |
| Average (Low) - Chlorophyll Content    | note                                |
| Chlorophyll Content- average [SPAD]:   | note                                |
| Device name                            | select_one DeviceNameChloro         |
| Soil & LAI survey                      |                                     |
| Soil Moisture                          |                                     |
| Select type of Measuring Person        | select_one MPtype                   |
| Measuring Person [Name]                | select_one_external MP              |
| Measuring Person [Soil Moisture]       | hidden                              |
| Select type of Minute Taker            | select_one MPtype                   |
| Minute Taker [Name]                    | select_one_external MP              |
| Minute Taker [Soil Moisture]           | hidden                              |
| Number of measurements                 | select_one<br>soilmoistmeasurements |
| Soil Moisture Sampling                 |                                     |

|                                            |                           |
|--------------------------------------------|---------------------------|
| [1] - Voltage [mV]                         | decimal                   |
| [1] - Soil Moisture [%Vol]                 | decimal                   |
| [2] - Voltage [mV]                         | decimal                   |
| [2] - Soil Moisture [%Vol]                 | decimal                   |
| [3] - Voltage [mV]                         | decimal                   |
| [3] - Soil Moisture [%Vol]                 | decimal                   |
| [4] - Voltage [mV]                         | decimal                   |
| [4] - Soil Moisture [%Vol]                 | decimal                   |
| [5] - Voltage [mV]                         | decimal                   |
| [5] - Soil Moisture [%Vol]                 | decimal                   |
| Voltage - average [mV]:                    | note                      |
| Volumetric water content - average [%Vol]: | note                      |
| select measurement for cylinder probe      | select_one soilvaluecheck |
| Device Name                                | select_one DeviceNameSoil |
| Dry Cracks                                 |                           |
| Select type of Measuring Person            | select_one MPtype         |
| Measuring Person [Name]                    | select_one_external MP    |
| Measuring Person [Dry Cracks]              | hidden                    |
| Select type of Minute Taker                | select_one MPtype         |
| Minute Taker [Name]                        | select_one_external MP    |
| Minute Taker [DryCracks]                   | hidden                    |
| Maximum Widths [mm]                        | integer                   |
| Soil Sample Field (Cylinder)               |                           |
| Select type of Measuring Person            | select_one MPtype         |
| Measuring Person [Name]                    | select_one_external MP    |
| Measuring Person [Soil sample Field]       | hidden                    |
| Select type of Minute Taker                | select_one MPtype         |
| Minute Taker [Name]                        | select_one_external MP    |
| Minute Taker [Soil Sample Field]           | hidden                    |
| Time                                       | time                      |
| Estimated Plant Wetness                    | select_one plantwetness   |
| Samplename                                 | text                      |
| Moisture [mV]                              | note                      |
| Moisture [%]                               | note                      |
| Sample Ring Volume [cm³]                   | integer                   |
| Leaf Area Index (LAI)                      |                           |
| Select type of Measuring Person            | select_one MPtype         |
| Measuring Person [Name]                    | select_one_external MP    |
| Measuring Person [LAI]                     | hidden                    |
| Select type of Minute Taker                | select_one MPtype         |
| Minute Taker [Name]                        | select_one_external MP    |

|                                   |                                    |
|-----------------------------------|------------------------------------|
| Minute Taker [LAI]                | hidden                             |
| Sun exposure                      | select_one LAISun                  |
| Device Name                       | select_one DeviceNameLAI           |
| Filename                          | text                               |
| LAI value                         | decimal                            |
| SEL-Value (Standard Error of LAI) | decimal                            |
| Spectrometry survey               |                                    |
| Spectrometer (SSU 1,3,5,7,9)      |                                    |
| Device Name                       | select_one DeviceNameSpectral      |
| Selected Foreoptic                | select_one SpectralForeOptics      |
| Measurement type                  | select_one SpectralMeasurementType |
| White Reference 1                 | text                               |
| Upload White Reference 1          | file                               |
| Filename 1 - 10                   | text                               |
| Upload File 1 - 10                | file                               |
| White Reference 2                 | text                               |
| Upload White Reference 2          | file                               |
|                                   |                                    |
| Comments                          | text                               |
| Photometer SSU5                   |                                    |
| Device Name                       | select_one DeviceNameSunPhoto      |
| Water Column [cm]                 | decimal                            |
| Sun-Distance Correction           | decimal                            |
| Sun Zenith Angle                  | decimal                            |
| Pressure [mbar]                   | decimal                            |
| Air Mass                          | decimal                            |
| Temperature                       | decimal                            |
| AOT 340 [nm]                      | text                               |
| AOT 380 [nm]                      | text                               |
| AOT 440 [nm]                      | text                               |
| AOT 500 [nm]                      | text                               |
| AOT 675 [nm]                      | text                               |
| AOT 870 [nm]                      | text                               |
| AOT 936 [nm]                      | text                               |
| AOT 1020 [nm]                     | text                               |
| AOT 1640 [nm]                     | text                               |
